# Supplementary material
Source: Copernicus journal article supplement (doi:10.5194/egusphere-2026-3094)
Supplement: Supplementary file 1 [file egusphere-2026-3094-supplement.pdf]

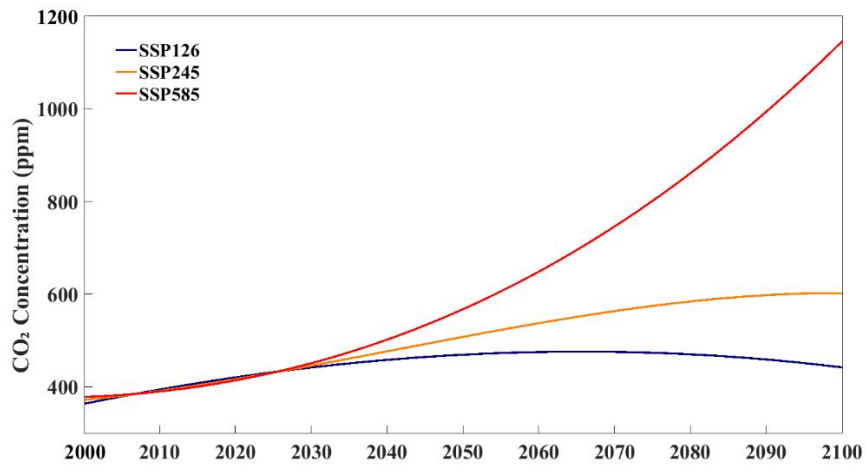

**Figure. S1** Carbon dioxide concentrations under SSP126, SSP245, and SSP585 scenarios from CMIP6.

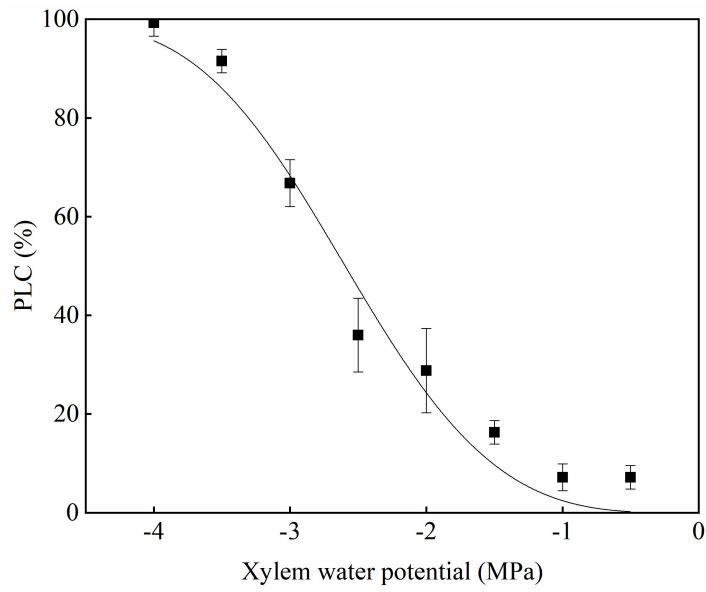

**Figure. S2** Stem vulnerability curve of *Pinus tabuliformis* L. plantations. The solid line represents the fit with a Weibull function. PLC, percentage loss of xylem hydraulic conductivity.

**Table S1** Major parameters of the BBGC-Sperry model for *Pinus tabuliformis* L.

plantations

| Parameter                                                                                                         | values             |
|-------------------------------------------------------------------------------------------------------------------|--------------------|
| <b>(a) Biome-BGC model</b>                                                                                        |                    |
| Transfer growth period fraction of growing season (%)                                                             | 0.3                |
| Litterfall fraction of growing season (%)                                                                         | 0.3                |
| Annual leaf and fine root turnover fraction (yr <sup>-1</sup> )                                                   | 0.35               |
| Annual live wood turnover fraction (yr <sup>-1</sup> )                                                            | 0.7                |
| Allocation new fine root C:new leaf C                                                                             | 0.9                |
| Allocation new stem C:new leaf C                                                                                  | 2.51               |
| Allocation new live wood C:new total wood C                                                                       | 0.059 <sup>a</sup> |
| Allocation new root C:new stem C                                                                                  | 0.29               |
| Allocation current growth proportion (%)                                                                          | 0.5                |
| C:N of leaves                                                                                                     | 33.1 <sup>b</sup>  |
| C:N of leaf litter                                                                                                | 132.0 <sup>b</sup> |
| C:N of fine roots                                                                                                 | 38                 |
| C:N of live wood                                                                                                  | 50                 |
| C:N of dead wood                                                                                                  | 1400               |
| Leaf litter labile proportion                                                                                     | 0.26 <sup>b</sup>  |
| Leaf litter cellulose proportion                                                                                  | 0.49               |
| Leaf litter lignin proportion                                                                                     | 0.25               |
| Fine root labile proportion                                                                                       | 0.25 <sup>c</sup>  |
| Fine root cellulose proportion                                                                                    | 0.5                |
| Fine root lignin proportion                                                                                       | 0.25               |
| Dead wood cellulose proportion                                                                                    | 0.71               |
| Dead wood lignin proportion                                                                                       | 0.29               |
| Canopy light extinction coefficient                                                                               | 0.50 <sup>d</sup>  |
| All-sided to projected leaf area ratio                                                                            | 2.6                |
| Specific leaf area (m <sup>2</sup> kg <sup>-1</sup> C)                                                            | 12.7 <sup>f</sup>  |
| Ratio of shaded SLA:sunlit SLA                                                                                    | 2                  |
| Fraction of leaf N in Rubisco                                                                                     | 0.05               |
| Maximum stomatal conductance (m s <sup>-1</sup> )                                                                 | 0.003 <sup>d</sup> |
| Cuticular conductance (m s <sup>-1</sup> )                                                                        | 0.00001            |
| Boundary layer conductance (m s <sup>-1</sup> )                                                                   | 0.01               |
| Leaf water potential: start of conductance reduction (MPa)                                                        | -0.5 <sup>a</sup>  |
| Leaf water potential: complete conductance reduction (MPa)                                                        | -2.2 <sup>a</sup>  |
| VPD: start of conductance reduction (Pa)                                                                          | 50 <sup>e</sup>    |
| VPD: complete conductance reduction (Pa)                                                                          | 2500 <sup>e</sup>  |
| <b>(b) Sperry model</b>                                                                                           |                    |
| Weibull function <i>b</i> and <i>c</i> for root, stem, leaf                                                       | b=2.9, c=3.5       |
| Maximum whole-plant hydraulic conductance per leaf area (mmol s <sup>-1</sup> m <sup>-2</sup> MPa <sup>-1</sup> ) | 2.4                |

|                                                                      |      |
|----------------------------------------------------------------------|------|
| Maximum diffusive conductance ( $\text{mmol s}^{-1} \text{m}^{-2}$ ) | 37.9 |
| Average resistance in rhizosphere (%)                                | 50   |
| Root depth coefficient                                               | 0.98 |
| Number of root and soil layers                                       | 5    |

---

Note: C = carbon; N = nitrogen; LAI = leaf area index; SLA = specific leaf area; VPD = vapor pressure deficit

<sup>a</sup> = Pietsch et al. (2005);

<sup>b</sup> = Berg et al. (1984);

<sup>c</sup> = Aber et al. (1990);

<sup>d</sup> = Zhang et al. (2024a);

<sup>e</sup> = Kellomäki and Wang (1997);

<sup>f</sup> = Ouyang et al. (2014).

## References

Aber, J.D., Melillo, J.M., McClaugherty, C.A., 1990. Predicting long-term patterns of mass loss, nitrogen dynamics, and soil organic matter formation from initial fine litter chemistry in temperate forest ecosystems. *Canadian Journal Botany* 68, 2201–2208. <https://doi.org/10.1139/B90-287>.

Berg, B., Ekbohm, G., McClaugherty, C., 1984. Lignin and holocellulose relations during long-term decomposition of some forest litters. Long-term decomposition in a Scots pine forest. IV. *Canadian Journal Botany* 62, 2540–2550. <https://doi.org/10.1139/b84-345>.

Kellomäki S, Wang K Y. 1997. Effects of elevated O<sub>3</sub> and CO<sub>2</sub> concentrations on photosynthesis and stomatal conductance in Scots pine. *Plant Cell Environment*, 20: 995–1006. <https://doi.org/10.1111/j.1365-3040.1997.tb00676.x>.

Ouyang, S., Wang, X., Wu, Y.L., Sun, J.X., 2014. Contrasting responses of net primary productivity to inter-annual variability and changes of climate among three forest types in northern. China. *Journal of Plant Ecology* 7, 309–320. <https://doi.org/10.1093/jpe/rtt066>.

Pietsch S A, Hasenauer H, Thornton P E. 2005. BGC-model parameters for tree

species growing in central European forests. *For Ecol Manage*, 211: 264–295.

<https://doi.org/10.1016/j.foreco.2005.02.046>.

Zhang, Z.D., Jia, X.X., Zhu, P., Hung, M.B., Ren, L.D., Shao, M.A., 2024a.

Estimating the optimal vegetation coverage for the dominant tree and shrub species over China's northwest drylands. *Science China-Earth Sciences* 67,

1500–1517. <https://doi.org/10.1007/s11430-023-1287-x>.
